# Supplementary material
Source: publisher site journal article supplement (https://www.dovepress.com/article/586598)
Supplement: Supplementary file 1 [file Supplementary%20Materials.docx]

**Table S1. Clinical laboratory indicators of Mechanically Ventilated versus Non-Ventilated COVID-19 Patients.**

| **Variable** | **Total**  **(N=69)** | **NMV**  **(N=28)** | **IMV**  **(N=41)** | ***P* value** |
| --- | --- | --- | --- | --- |
| **Initial laboratory findings, median (IQR)** |  |  |  |  |
| White blood cell, 109/L | 9.05 (6.21-13.3) | 7.03 (4.42-12.4) | 11.1 (6.57-13.6) | 0.111 |
| Neutrophil, 109/L | 8.32 (4.63-12.3) | 6.45 (3.91-10.5) | 9.78 (4.92-12.4) | 0.131 |
| Lymphocytes, 109/L | 0.48 (0.26-1.00) | 0.35 (0.22-0.72) | 0.64 (0.38-1.02) | **0.019** |
| Monocyte, 109/L | 0.48 (0.24-0.74) | 0.36 (0.21-0.52) | 0.53 (0.33-0.77) | 0.110 |
| Hemoglobulin, g/L | 116 (100-127) | 115 (96.5-124) | 119 (103-137) | 0.197 |
| Hematocrit, n (%) | 35.5 (30.2-39.3) | 34.0 (28.8-37.2) | 36.5 (30.8-39.5) | 0.289 |
| Platelets, 109/L | 164 (126-222) | 162 (122-220) | 166 (132-222) | 1.000 |
| PH | 7.40 (7.34-7.43) | 7.42 (7.39-7.45) | 7.37 (7.28-7.43) | **0.014** |
| PaO2, mmHg | 78.3 (61.9-101) | 82.6 (66.4-103) | 78.0 (56.0-95.9) | 0.454 |
| PaCO2, mmHg | 35.7 (29.7-43.6) | 36.7 (28.1-43.9) | 35.4 (30.1-43.0) | 0.614 |
| HCO3-, mmol/L | 22.8 (18.2-25.9) | 23.8 (18.1-27.8) | 22.0 (18.3-25.4) | 0.291 |
| Lactate, mmol/L | 1.85 (1.17-2.70) | 1.50 (1.00-1.95) | 2.10 (1.30-3.60) | **0.027** |
| Albumin, g/L | 31.5 (28.8-35.0) | 30.7 (28.4-34.0) | 32.6 (29.4-35.0) | 0.212 |
| Total Bilirubin, umol/L | 9.10 (5.55-13.6) | 8.00 (5.00-11.8) | 9.50 (6.10-14.9) | 0.334 |
| Aspartate Aminotransferase, u/L | 33.5 (17.5-64.0) | 23.0 (15.0-61.0) | 35.0 (20.0-63.0) | 0.301 |
| Alanine Aminotransferase, u/L | 24.5 (12.8-57.2) | 33.0 (11.5-58.5) | 23.0 (15.0-47.0) | 0.740 |
| Lactate Dehydrogenase, u/L | 325 (262-400) | 306 (261-354) | 336 (274-413) | 0.234 |
| Creatine Kinase, u/L | 77.0 (37.5-236) | 51.5 (28.5-202) | 87.0 (50.0-240) | 0.073 |
| Creatine Kinase-MB, u/L | 19.0 (14.0-30.5) | 14.0 (11.2-19.5) | 25.0 (15.0-33.0) | **0.001** |
| Cardiac Troponin I, ng/mL | 0.02 (0.01-0.07) | 0.02 (0.01-0.05) | 0.02 (0.01-0.07) | 0.341 |
| Creatinine, umol/L | 107 (72.0-181) | 110 (70.0-209) | 107 (72.0-173) | 0.985 |
| Blood Urea Nitrogen, mmol/L | 10.3 (7.49-16.6) | 10.7 (7.84-16.5) | 10.3 (7.49-19.1) | 0.927 |
| K+, mmol/L | 4.11 (3.77-4.57) | 4.14 (3.81-4.51) | 4.09 (3.72-4.57) | 0.807 |
| Na+, mmol/L | 141 (136-143) | 142 (138-143) | 140 (136-143) | 0.281 |
| High-sensitivity C-reactive protein, mg/L | 45.0 (15.8-100) | 41.7 (12.9-103) | 47.1 (19.1-98.9) | 0.983 |
| Procalcitonin, ng/mL | 0.38 (0.11-1.29) | 0.17 (0.08-0.86) | 0.46 (0.19-2.41) | **0.034** |
| Fibrinogen, g/L | 4.17 (3.22-4.98) | 4.27 (3.17-5.14) | 4.05 (3.22-4.86) | 0.517 |
| D-dimer, ug/L | 2217 (770-4222) | 1927 (597-2798) | 2991 (1299-5046) | 0.055 |
| IL-2 | 2.83 (2.08-3.70) | 2.67 (2.04-3.33) | 2.92 (2.14-3.82) | 0.290 |
| IL-4 | 3.22 (2.70-3.95) | 3.15 (2.82-3.67) | 3.40 (2.69-4.02) | 0.712 |
| IL-6 | 12.3 (6.10-69.7) | 7.88 (5.58-20.9) | 13.2 (8.04-88.3) | 0.102 |
| IL-10 | 7.57 (4.96-13.8) | 7.27 (4.96-11.7) | 8.00 (4.98-17.1) | 0.602 |
| TNF-α | 4.38 (3.05-6.32) | 4.14 (2.82-6.32) | 4.54 (3.17-6.27) | 0.810 |
| IFN-γ | 2.95 (1.79-4.57) | 2.71 (1.77-4.60) | 3.24 (2.23-4.56) | 0.671 |
| Lymphocyte CD45+ | 328 (163-585) | 321 (160-461) | 349 (192-644) | 0.494 |
| Total CD3+ T cells | 196 (121-352) | 194 (116-274) | 199 (130-371) | 0.683 |
| CD4+ helper/inducer T cells | 102 (57.0-194) | 90.0 (53.5-154) | 112 (71.0-210) | 0.408 |
| CD8+ suppressor/cytotoxic T cells | 67.5 (37.2-145) | 54.0 (41.5-131) | 76.0 (31.0-142) | 0.932 |
| CD19+ B lymphocytes | 42.0 (19.8-111) | 31.0 (16.0-85.5) | 46.0 (22.0-113) | 0.305 |
| CD56+ NK cells | 29.0 (15.0-62.2) | 33.0 (14.5-54.0) | 25.0 (15.0-95.0) | 0.739 |

IMV:Invasive mechanical ventilation, NMV: no mechanical ventilation .

Bold texts indicate P <.05.

**Table S2. The intersecting genes of the top 50 hub genes identified by the six metrics of cytoHubba between mechanically ventilated and non-ventilated COVID-19 patient groups.**

| Gene | MCC | MNC | Degree | EPC | Radiality | Betweenness |
| --- | --- | --- | --- | --- | --- | --- |
| CXCL8 | 42 | 1 | 1 | 1 | 1 | 1 |
| UBB | 22 | 2 | 2 | 2 | 4 | 2 |
| FCGR3B | 47 | 4 | 5 | 7 | 27 | 18 |
| CXCL1 | 43 | 6 | 6 | 5 | 24 | 32 |
| PLK1 | 34 | 12 | 7 | 28 | 11 | 6 |
| FAU | 19 | 10 | 8 | 13 | 15 | 9 |
| CXCR4 | 48 | 8 | 9 | 6 | 12 | 15 |
| RPS9 | 11 | 7 | 11 | 8 | 33 | 21 |
| CXCL2 | 44 | 15 | 14 | 11 | 14 | 26 |
| CD163 | 50 | 36 | 29 | 25 | 20 | 44 |

The numbers in the table represent the rank of that gene for a particular metric among all the sorted genes.

**
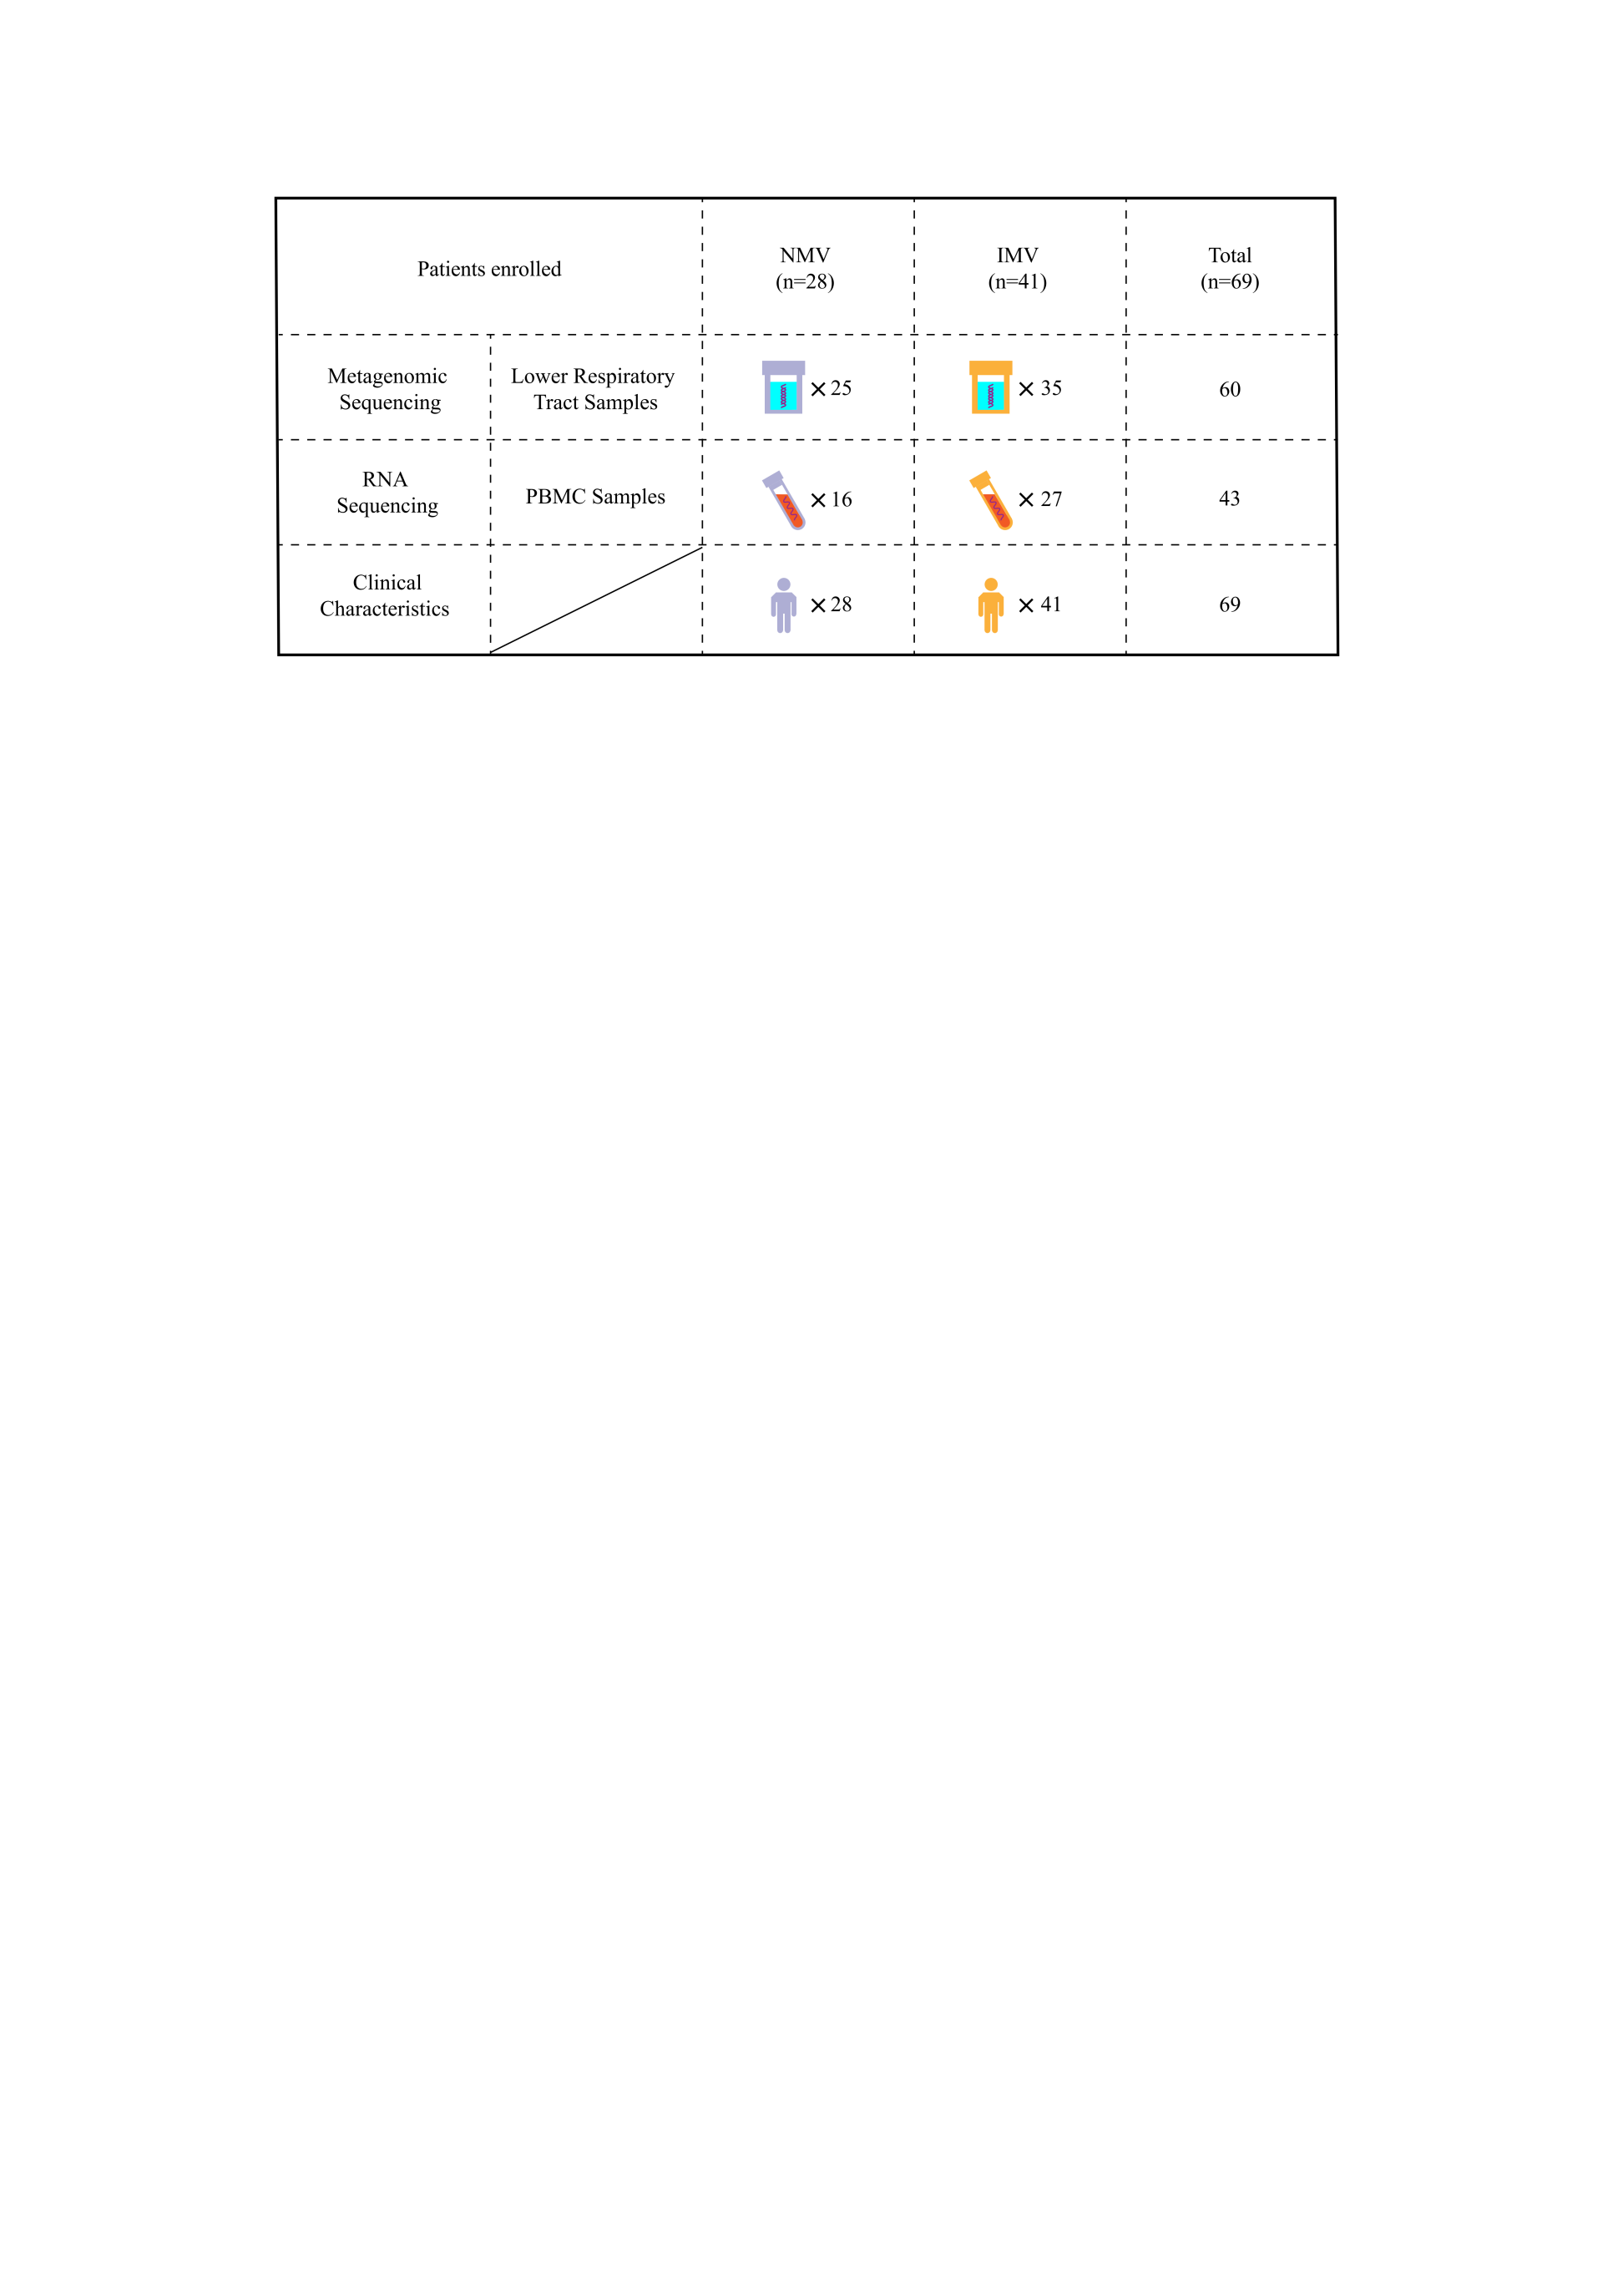
**

**Figure S1. Overview of the experimental design.**


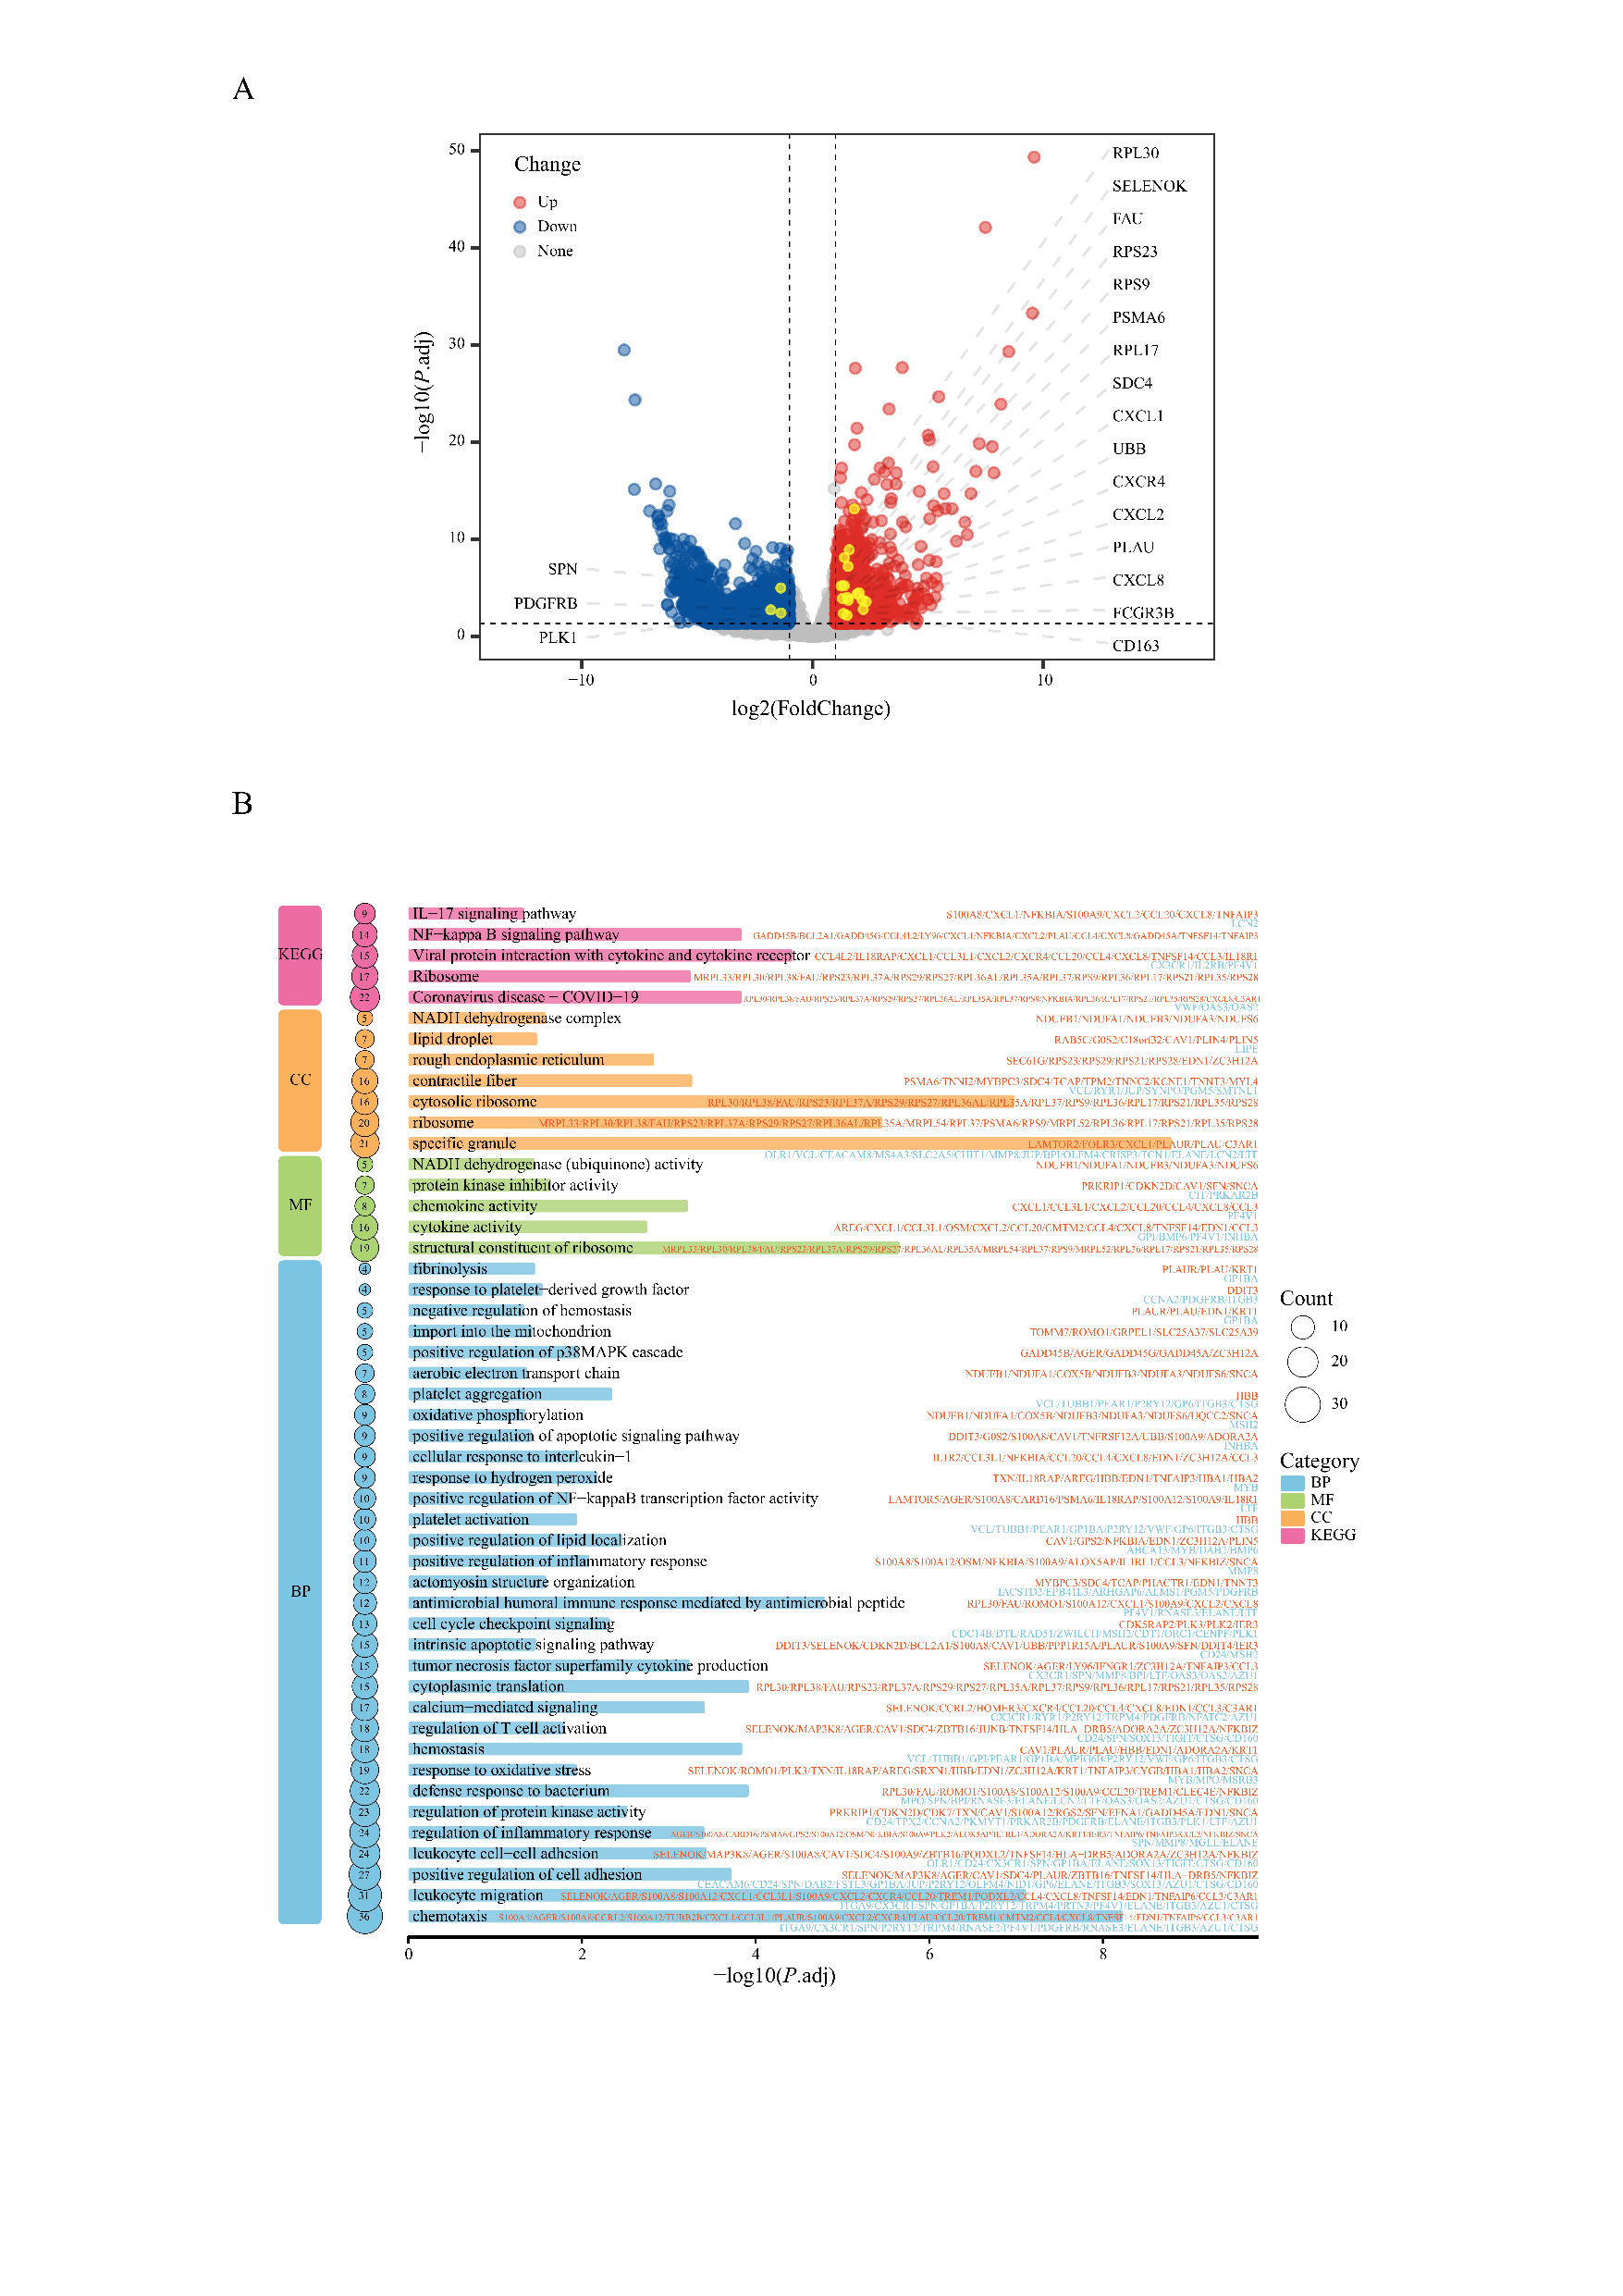


**Figure S2. Transcriptome analysis of PBMCs in Invasive mechanical ventilation versus Non-mechanical ventilation COVID-19 Patients.**

A: The volcano plot shows 3,282 differentially expressed genes (DEGs) between the Invasive mechanical ventilation (IMV) and the Non-mechanical ventilation (NMV) group. A positive log2(fold change) indicates overexpression of blood genes in the IMV group relative to the NMV group, while a negative log2(fold change) indicates downregulation in the IMV group. DEGs with an adjusted *P* < 0.05 and an absolute log2(fold change) > 1 are highlighted. Only the 19 genes selected for subsequent machine learning analysis are labeled.

B: Pathway enrichment analysis of the differentially expressed genes. From the 3,282 DEGs, 392 genes were selected for pathway enrichment analysis using the PPI network from the STRING website. A total of 49 key and representative pathways with an adjusted *P* < 0.05 were selected for presentation.Gene names labeled in red and blue represent up-regulated and down-regulated genes, respectively.
